# Supplementary material for: Spatio-Temporal Pattern and Risk Factor Analysis of Hand, Foot and Mouth Disease Associated with Under-Five Morbidity in the Beijing–Tianjin–Hebei Region of China
Source: PubMed Central journal article supplement (PMC5409617; doi:10.3390/ijerph14040416), 2017-04-13
Supplement: ijerph-14-00416-s001.pdf [file ijerph-14-00416-s001.pdf]

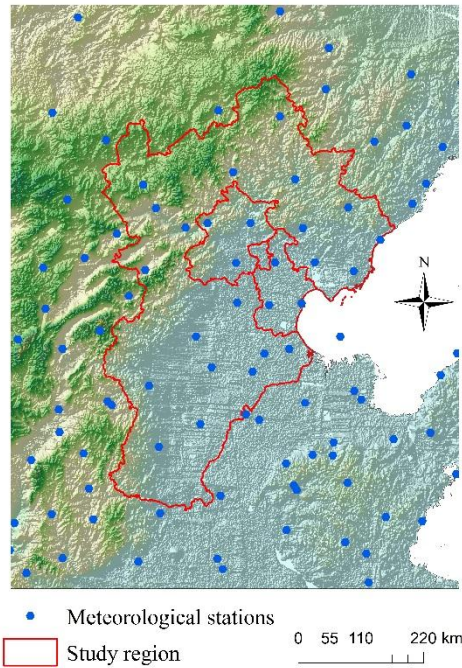

**Figure S1.** Distribution of meteorological stations and terrain around the study region.

**Table S1.** Pearson's correlation between socioeconomic factors.

| Variables      | Prim. ind. | GDP per capita | Tert. ind. |
|----------------|------------|----------------|------------|
| GDP per capita | -0.57***   |                |            |
| Tert. ind.     | -0.36***   | 0.29***        |            |
| Popu. Den.     | -0.39***   | 0.39***        | 0.40***    |

Note: Popu. den.: population density; Prim. ind.: proportion of primary industry (%); Tert. ind.: proportion of tertiary industry (%). \*\*\* < 0.01 significance level.

**Table S2.** Pearson's correlation between meteorological factors.

| Variables         | Temperature | Precipitation | Relative humidity |
|-------------------|-------------|---------------|-------------------|
| Precipitation     | 0.33***     |               |                   |
| Relative humidity | 0.34***     | 0.43***       |                   |
| Sunshine hours    | 0.13**      | -0.32***      | -0.63***          |

Note: \*\*\* < 0.01 significance level; \*\* < 0.05 significance level.

**Table S3.** Pearson's correlation between HFMD incidence and risk factors.

| <b>Prim. ind.</b> | <b>GDP per capital</b> | <b>Tert. ind.</b> | <b>Popu. Den.</b> |
|-------------------|------------------------|-------------------|-------------------|
| -0.50**           | 0.31**                 | 0.25**            | 0.13*             |

Note: Popu. den.: population density; Prim. ind.: proportion of primary industry (%); Tert. ind.: proportion of tertiary industry (%). \*\* < 0.01 significance level; \* < 0.1 significance level.
